# Supplementary material for: AXII4XIII5Te12 (A = Rb, Cs; XII = Mn, Zn, Cd; XIII = Ga, In): quaternary semiconducting tellurides with very low thermal conductivities
Source: Royal Society of Chemistry journal article supplement (doi:10.1039/c6dt03630a), 2016-01-01
Supplement: c6dt03630a1.pdf [file c6dt03630a1.pdf]

## ***Electronic Supplementary Information***

### **AX<sup>II</sup><sub>4</sub>X<sup>III</sup><sub>5</sub>Te<sub>12</sub> (A = Rb, Cs; X<sup>II</sup> = Mn, Zn, Cd; X<sup>III</sup> = Ga, In): quaternary semiconducting tellurides with very low thermal conductivities**

Hua Lin,<sup>a</sup> Hong Chen,<sup>a</sup> Yu-Jun Zheng,<sup>a,b</sup> Ju-Song Yu,<sup>a,b</sup> and Li-Ming Wu<sup>\*,a</sup>

*<sup>a</sup>Key Laboratory of Optoelectronic Materials Chemistry and Physics, Fujian Institute of Research on the Structure of Matter, Chinese Academy of Sciences, Fuzhou, Fujian 350002, People's Republic of China*

*<sup>b</sup>University of Chinese Academy of Sciences, Beijing 100039, People's Republic of China*

*\* E-mail: liming\_wu@fjirsm.ac.cn. Tel: (011)86-591-63173211.*

#### **Experimental**

##### **Syntheses**

All operations were carried out under an argon-filled glovebox. Reaction mixtures of X (X = Mn or Cd, 5N), Ga (5N), Te (5N) and ACl (A = Rb or Cs, 3N) in the molar ratio of 4/5/12/2 into fused-silica tubes under vacuum. These tubes were placed into the computer-controlled furnace and then heated to 1273K in 50h, kept at this temperature for 4 days, followed by slowly cooled at 4 K/h to 473K and then turned off the furnace. The raw products were washed with distilled water and then dried with ethanol. Title compounds were stable for more than six months in air. Analyses of title compounds by SEM/EDX (JSM6700F, FESEM) showed the presence of A, X, Ga and Te in the approximate ratio of 1:4:5:12, but no other element. The homogeneous target products were checked by the powder X-ray diffraction (PXRD) data using a

## ***Electronic Supplementary Information***

Rigaku DMAX 2500 diffractometer with Cu-K $\alpha$  radiation (see Figure S1 in ESI).

The resulting pure phases of title compounds were ground into a fine powder and subsequently hot pressed around 773 K under a pressure of 100 MPa for 1 h. The obtained pellets had relative densities no less than 98% of the theoretical value.

### **Property Characterization**

The solid-state optical absorption spectrum was performed at room temperature using a Perkin-Elmer Lambda 950 UV–Vis spectrophotometer. The thermal conductivity were measured by laser flash techniques with a Netzsch LFA 457 system and calculated using the formula  $\kappa = D \times C_p \times d$ , where  $D$  was the measured thermal diffusivity,  $C_p$  was the heat capacity estimated using the Dulong-Petit model ( $C_p = 3nR$ , where  $n$  is the number of atoms per formula unit and  $R$  is the gas constant) and  $d$  was the sample density.<sup>1</sup> The uncertainty of the thermal conductivity  $k$  is estimated to be within 5%, considering the uncertainties for  $D$ ,  $C_p$  and  $d$ .

### **Single-Crystal X-ray diffraction (XRD)**

Single-crystal XRD at room temperature was collected on a Mercury 70 CCD diffractometer with Mo K $\alpha$  radiation. The absorption correction was done,<sup>2</sup> and structures were solved by direct methods and refined using the SHELX-97 software.<sup>3</sup> The structural refinement was performed in similar method as the AX<sup>II</sup><sub>4</sub>X<sup>III</sup><sub>5</sub>Q<sub>12</sub> compounds,<sup>4</sup> the three tetrahedral position are randomly

## Electronic Supplementary Information

occupied by the X (X = Mn or Cd) and Ga atoms with refined occupancy of X:Ga = 4:5, which is consistent with the EDX analysis. The refinement data are listed in Tables S1–4.

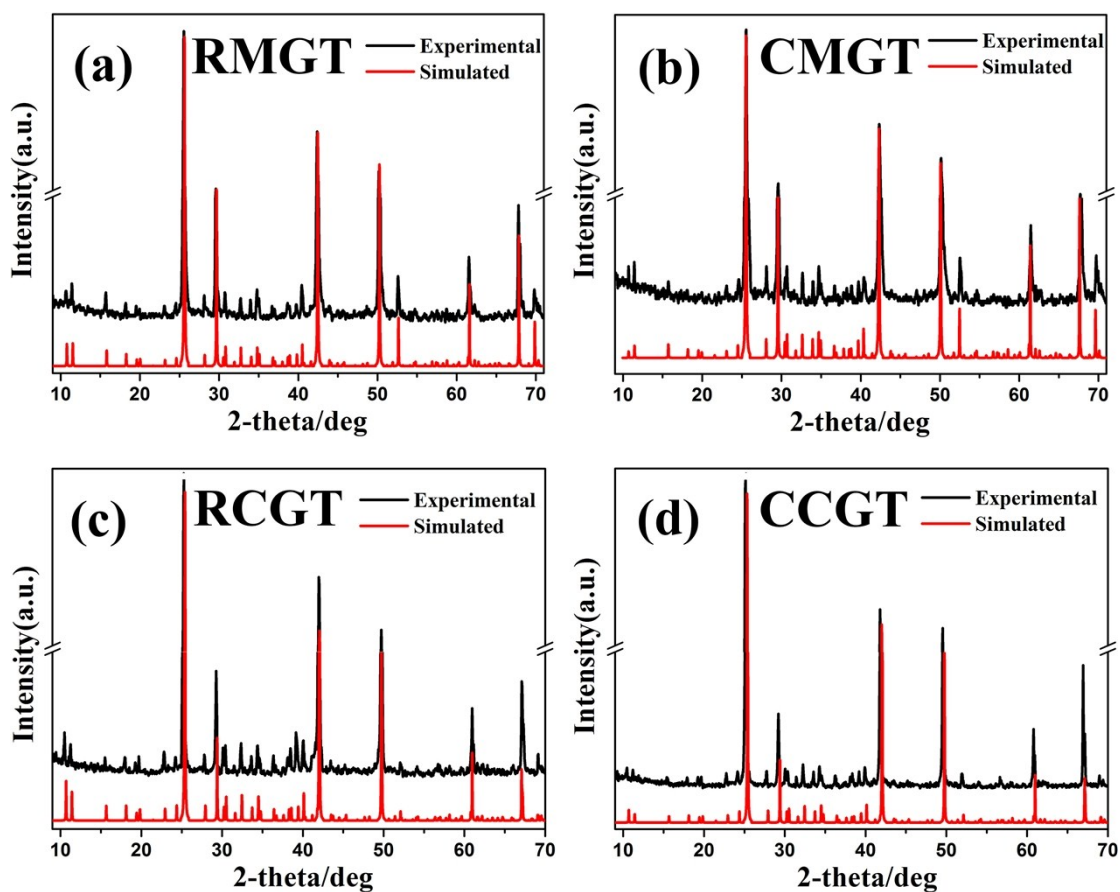

**Figure S1.** Experimental (black) and simulated (red) X-ray powder diffraction patterns for (a) RMGT, (b) CMGT, (c) RCGT, and (d) CCGT.

## Electronic Supplementary Information

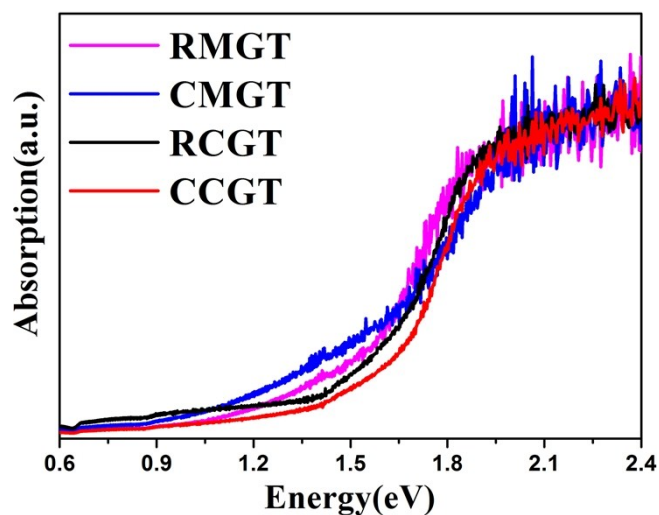

**Figure S2.** Diffuse reflection spectra of  $AX_4Ga_5Te_{12}$  ( $A = Rb, Cs$ ;  $X = Mn, Cd$ ).

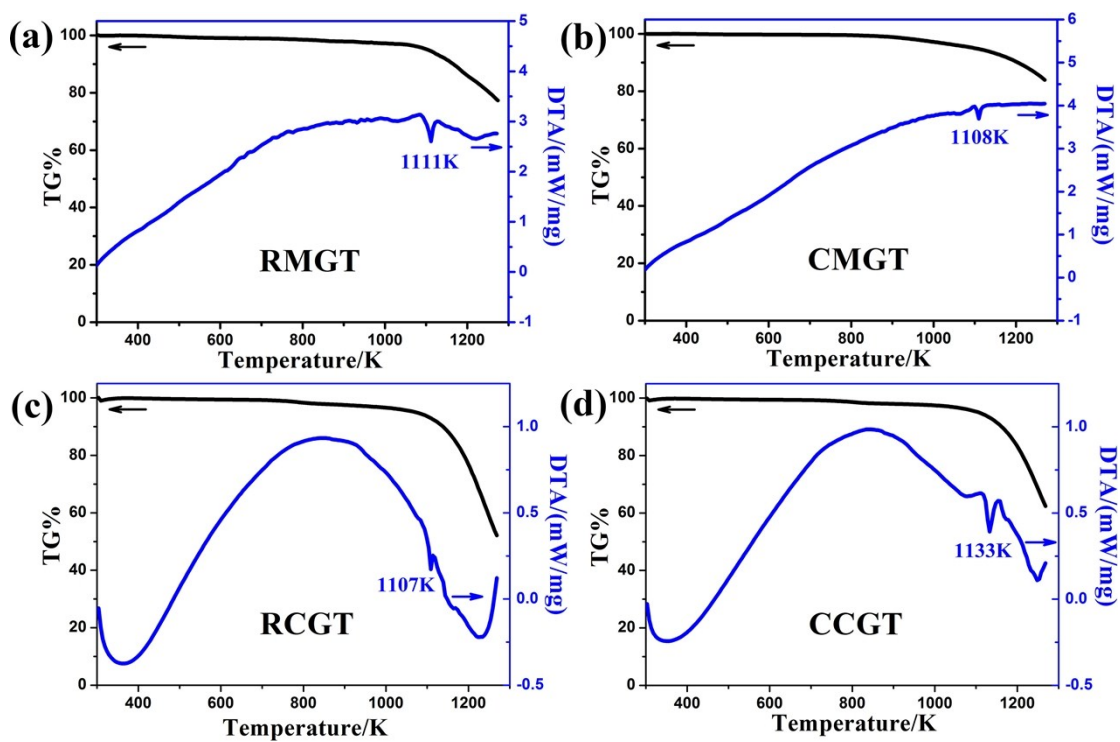

**Figure S3.** TG (black) and DTA (blue) diagrams of (a) **RMGT**, (b) **CMGT**, (c) **RCGT**, and (d) **CCGT**.

### *Electronic Supplementary Information*

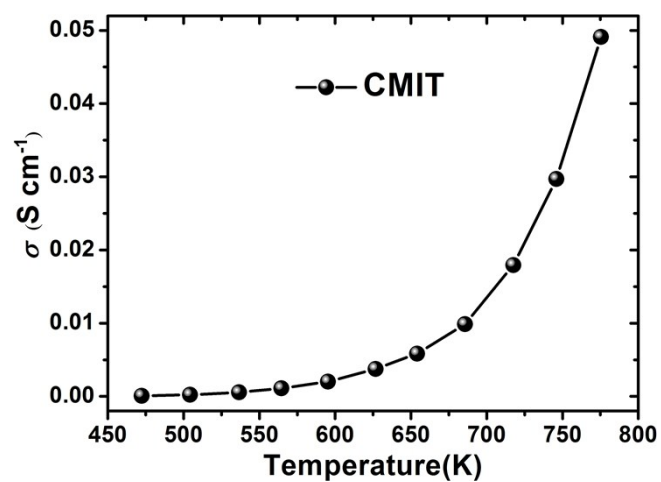

**Figure S4.** Electrical conductivity ( $\sigma$ ) as a function of temperature for **CMIT** using a ULVAC-RIKO ZEM-3 instrument system at 473–773K.

## *Electronic Supplementary Information*

**Table S1.** Crystallographic data and refinement details for AX<sub>4</sub>Ga<sub>5</sub>Te<sub>12</sub> (A = Rb, Cs; X = Mn, Cd).

|                                                                                          | <b>RMGT</b>                                        | <b>CMGT</b>                                        | <b>RCGT</b>                                        | <b>CCGT</b>                                        |
|------------------------------------------------------------------------------------------|----------------------------------------------------|----------------------------------------------------|----------------------------------------------------|----------------------------------------------------|
| formula                                                                                  | RbMn <sub>4</sub> Ga <sub>5</sub> Te <sub>12</sub> | CsMn <sub>4</sub> Ga <sub>5</sub> Te <sub>12</sub> | RbCd <sub>4</sub> Ga <sub>5</sub> Te <sub>12</sub> | CsCd <sub>4</sub> Ga <sub>5</sub> Te <sub>12</sub> |
| fw                                                                                       | 2185.03                                            | 2232.47                                            | 2414.87                                            | 2462.31                                            |
| crystal system                                                                           | trigonal                                           | trigonal                                           | trigonal                                           | trigonal                                           |
| crystal color                                                                            | black                                              | black                                              | black                                              | black                                              |
| space group                                                                              | <i>R</i> 3 (no.146)                                | <i>R</i> 3 (no.146)                                | <i>R</i> 3 (no.146)                                | <i>R</i> 3 (no.146)                                |
| <i>a</i> (Å)                                                                             | 15.3432(6)                                         | 15.376(4)                                          | 15.439(8)                                          | 15.485(8)                                          |
| <i>c</i> (Å)                                                                             | 10.4161(8)                                         | 10.441(4)                                          | 10.477(8)                                          | 10.507(14)                                         |
| <i>V</i> (Å <sup>3</sup> )                                                               | 2123.6(2)                                          | 2138(3)                                            | 2163(2)                                            | 2182(3)                                            |
| <i>Z</i>                                                                                 | 3                                                  | 3                                                  | 3                                                  | 3                                                  |
| <i>D<sub>c</sub></i> (g/cm <sup>3</sup> )                                                | 5.13                                               | 5.20                                               | 5.56                                               | 5.62                                               |
| <i>μ</i> (mm <sup>-1</sup> )                                                             | 20.1                                               | 19.6                                               | 21.0                                               | 20.4                                               |
| GOOF on <i>F</i> <sup>2</sup>                                                            | 1.036                                              | 1.034                                              | 1.042                                              | 1.012                                              |
| <i>R</i> <sub>1</sub> , <i>wR</i> <sub>2</sub> ( <i>I</i> > 2σ( <i>I</i> )) <sup>a</sup> | 0.0285,0.0665                                      | 0.0232,0.0489                                      | 0.0199,0.0497                                      | 0.0255,0.0641                                      |
| <i>R</i> <sub>1</sub> , <i>wR</i> <sub>2</sub> (all data)                                | 0.0294,0.0669                                      | 0.0237,0.0491                                      | 0.0201,0.0498                                      | 0.0282,0.0648                                      |
| largest diff. peak and hole(e/ Å <sup>3</sup> )                                          | 2.79, -1.31                                        | 1.48, -1.23                                        | 0.82, -0.90                                        | 0.81, -1.06                                        |

$$^a R_1 = \sum ||F_o| - |F_c|| / \sum |F_o|, wR_2 = [\sum w(F_o^2 - F_c^2)^2 / \sum w(F_o^2)^2]^{1/2}$$

## *Electronic Supplementary Information*

**Table S2.** Atomic coordinates and equivalent isotropic displacement parameters of  $\text{AMn}_4\text{Ga}_5\text{Te}_{12}$  (A = Rb and Cs).

| Atom                                                   | Wyck | x          | y          | z          | $U_{\text{(eq)}}(\text{\AA}^2)^*$ | Occu.           |
|--------------------------------------------------------|------|------------|------------|------------|-----------------------------------|-----------------|
| $\text{RbMn}_{4.0(3)}\text{Ga}_{5.0(3)}\text{Te}_{12}$ |      |            |            |            |                                   |                 |
| Rb1                                                    | 3a   | 0          | 0          | 0.5001(3)  | 0.0472(4)                         | 1               |
| M1=Mn1/Ga1                                             | 9b   | 0.17909(7) | 0.12852(6) | 0.9197(2)  | 0.0215(2)                         | 0.60(4)/0.40(4) |
| M2= Mn2/Ga2                                            | 9b   | 0.31233(7) | 0.08005(7) | 0.2491(2)  | 0.0208(3)                         | 0.53(3)/0.47(3) |
| M3= Mn3/Ga3                                            | 9b   | 0.23347(6) | 0.30630(7) | 0.2441 (2) | 0.0184(2)                         | 0.20(3)/0.80(3) |
| Te1                                                    | 9b   | 0.16781(5) | 0.11876(4) | 0.17699(6) | 0.0198(2)                         | 1               |
| Te2                                                    | 9b   | 0.21851(4) | 0.29737(3) | 0.49955(5) | 0.0190(2)                         | 1               |
| Te3                                                    | 9b   | 0.29718(4) | 0.07228(5) | 0.50495(4) | 0.0206(2)                         | 1               |
| Te4                                                    | 9b   | 0.05032(4) | 0.17669(5) | 0.81289(7) | 0.0219(2)                         | 1               |
| $\text{CsMn}_{4.0(3)}\text{Ga}_{5.0(3)}\text{Te}_{12}$ |      |            |            |            |                                   |                 |
| Cs1                                                    | 3a   | 0          | 0          | 0.5004(2)  | 0.0305(2)                         | 1               |
| M1=Mn1/Ga1                                             | 9b   | 0.17896(6) | 0.12867(5) | 0.91948(8) | 0.0173(2)                         | 0.62(4)/0.38(4) |
| M2= Mn2/Ga2                                            | 9b   | 0.31216(6) | 0.08002(6) | 0.24946(8) | 0.0174(3)                         | 0.50(3)/0.50(3) |
| M3= Mn3/Ga3                                            | 9b   | 0.23363(5) | 0.30638(6) | 0.24412(9) | 0.0155(2)                         | 0.21(3)/0.79(3) |
| Te1                                                    | 9b   | 0.17896(6) | 0.12867(5) | 0.91948(8) | 0.0173(2)                         | 1               |
| Te2                                                    | 9b   | 0.31216(6) | 0.08002(6) | 0.24946(8) | 0.0174(3)                         | 1               |
| Te3                                                    | 9b   | 0.23363(5) | 0.30638(6) | 0.24412(9) | 0.0155(2)                         | 1               |
| Te4                                                    | 9b   | 0.16807(4) | 0.11908(3) | 0.17643(5) | 0.0174(2)                         | 1               |

\* $U_{\text{(eq)}}$  is defined as one-third of the trace of the orthogonalized  $U_{ij}$  tensor.

## *Electronic Supplementary Information*

**Table S3.** Atomic coordinates and equivalent isotropic displacement parameters of  $\text{ACd}_4\text{Ga}_5\text{Te}_{12}$  (A = Rb and Cs).

| Atom                                                   | Wyck | x          | y          | z          | $U_{\text{(eq)}}(\text{\AA}^2)^*$ | Occu.            |
|--------------------------------------------------------|------|------------|------------|------------|-----------------------------------|------------------|
| $\text{RbCd}_{4.0(3)}\text{Ga}_{5.0(3)}\text{Te}_{12}$ |      |            |            |            |                                   |                  |
| Rb1                                                    | 3a   | 0          | 0          | 0.9991(2)  | 0.0531(3)                         | 1                |
| M1=Cd1/Ga1                                             | 9b   | 0.20485(3) | 0.48696(3) | 0.08603(6) | 0.0225(2)                         | 0.58 (4)/0.42(4) |
| M2=Cd2/Ga2                                             | 9b   | 0.58685(4) | 0.02033(4) | 0.08078(5) | 0.0230(2)                         | 0.49(2)/0.51(2)  |
| M3=Cd3/Ga3                                             | 9b   | 0.36018(5) | 0.09965(4) | 0.07753(6) | 0.0196(2)                         | 0.26(2)/0.74(2)  |
| Te1                                                    | 9b   | 0.54896(3) | 0.16804(3) | 0.01093(4) | 0.0229(2)                         | 1                |
| Te2                                                    | 9b   | 0.07825(3) | 0.29519(3) | 0.99962(4) | 0.0240(2)                         | 1                |
| Te3                                                    | 9b   | 0.29580(3) | 0.22404(4) | 0.00529(4) | 0.0262(2)                         | 1                |
| Te4                                                    | 9b   | 0.38424(3) | 0.53989(3) | 0.97468(5) | 0.0269(2)                         | 1                |
| $\text{CsCd}_{4.0(3)}\text{Ga}_{5.0(3)}\text{Te}_{12}$ |      |            |            |            |                                   |                  |
| Cs1                                                    | 3a   | 0          | 0          | 0.9995(2)  | 0.0363(2)                         | 1                |
| M1=Cd1/Ga1                                             | 9b   | 0.20479(4) | 0.48712(5) | 0.08534(7) | 0.0241(2)                         | 0.58 (4)/0.42(4) |
| M2=Cd2/Ga2                                             | 9b   | 0.58686(6) | 0.02089(6) | 0.08156(7) | 0.0248(2)                         | 0.50(2)/0.50(2)  |
| M3=Cd3/Ga3                                             | 9b   | 0.36013(7) | 0.09961(6) | 0.07728(8) | 0.0223(2)                         | 0.25(2)/0.75(2)  |
| Te1                                                    | 9b   | 0.54864(4) | 0.16734(4) | 0.01008(5) | 0.0245(2)                         | 1                |
| Te2                                                    | 9b   | 0.07838(4) | 0.29603(4) | 0.99930(5) | 0.0261(2)                         | 1                |
| Te3                                                    | 9b   | 0.29665(4) | 0.22466(6) | 0.00551(5) | 0.0276(2)                         | 1                |
| Te4                                                    | 9b   | 0.38406(4) | 0.53945(5) | 0.97549(6) | 0.0279(2)                         | 1                |

\* $U_{\text{(eq)}}$  is defined as one-third of the trace of the orthogonalized  $U_{ij}$  tensor.



## Electronic Supplementary Information

**Table S4.** Selected bond lengths (Å) of AX<sub>4</sub>Ga<sub>5</sub>Te<sub>12</sub> (A = Rb, Cs; X = Mn, Cd).

|          | RMGT      | CMGT     | RCGT     | CCGT     |
|----------|-----------|----------|----------|----------|
| M1–Te4   | 2.674(2)  | 2.676(2) | 2.721(2) | 2.724(2) |
| M1–Te4   | 2.684(2)  | 2.687(2) | 2.727(2) | 2.729(2) |
| M1–Te1   | 2.685(2)  | 2.687(2) | 2.713(2) | 2.718(4) |
| M1–Te2   | 2.726(2)  | 2.729(2) | 2.760(2) | 2.759(2) |
| M2–Te4   | 2.658(2)  | 2.661(2) | 2.670(2) | 2.680(2) |
| M2–Te3   | 2.672(2)  | 2.678(2) | 2.711(2) | 2.712(4) |
| M2–Te1   | 2.674(2)  | 2.680(2) | 2.723(2) | 2.720(2) |
| M2–Te3   | 2.713(2)  | 2.716(2) | 2.732(2) | 2.734(2) |
| M3–Te1   | 2.6239(9) | 2.628(2) | 2.649(2) | 2.657(2) |
| M3–Te2   | 2.6357(9) | 2.641(2) | 2.651(2) | 2.656(2) |
| M3–Te3   | 2.6553(9) | 2.659(2) | 2.676(2) | 2.681(2) |
| M3–Te2   | 2.668(2)  | 2.668(2) | 2.686(2) | 2.692(4) |
| A1–Te4×3 | 4.058(3)  | 4.072(2) | 4.057(3) | 4.075(4) |
| A1–Te1×3 | 4.073(3)  | 4.092(2) | 4.065(3) | 4.093(4) |
| A1–Te2×3 | 4.0940(5) | 4.108(2) | 4.090(2) | 4.114(2) |
| A1–Te3×3 | 4.1190(6) | 4.132(2) | 4.127(2) | 4.151(2) |

### References

- 1 K. A. Borup, J. D. Boor, H. Wang, F. Drymiotis, F. Gascoin, X. Shi, L. D. Chen, M. I. Fedorov, E. Müller, B. B. Iversen and G. J. Snyder, *Energy Environ. Sci.*, 2015, **8**, 423–435.
- 2 *Crystal Clear*, version 1.3.5; Rigaku Corp.: The Woodlands, TX, 1999.
- 3 G. M. Sheldrick, *SHELXTL*, version 5.1; Bruker-AXS: Madison, WI, 1998.
- 4 (a) H. Lin, L. J. Zhou and L. Chen, *Chem. Mater.*, 2012, **24**, 3406–3414. (b) H. Lin, L. Chen, L. J. Zhou and L. M. Wu, *J. Am. Chem. Soc.*, 2013, **135**, 12914–

## ***Electronic Supplementary Information***

12921. (c) H. Lin, Y. Liu, L. J. Zhou, H. J. Zhao and L. Chen, *Inorg. Chem.*, 2016, **55**, 4470–4475.
